# Supplementary material for: A Literature Review of 2019 Novel Coronavirus During the Early Outbreak Period: Epidemiology, Causes, Clinical Manifestation and Diagnosis, Prevention and Control
Source: Preprints.org preprint supplement (doi:10.20944/preprints202002.0060.v1), 2020-02-05
Supplement: Supplementary file 1 [file supplementary]

**Appendix 1: Published research articles on 2019-nCoV in January, 2020**

| **No.** | **Date** | **Title** | **Journal name** | **Language** | **Country** | **First author** | **Author affiliation** | ***Category** |
| --- | --- | --- | --- | --- | --- | --- | --- | --- |
| 1 | 1/15/2020 | Recent advances in the detection of respiratory virus infection in humans | Journal of medical virology | English | China | Naru Zhang | Department of Clinical Medicine, School of Medicine, Zhejiang University City College, Hangzhou, China | 2 |
| 2 | 1/15/2020 | Pathogenicity and control of coronavirus | Journal of Microbes and infection | Chinese | China | Yumei Wen | Department of pathogenic biology, School of basic medicine, Shanghai Medical College, Fudan University | 4 |
| 3 | 1/16/2020 | Outbreak of Pneumonia of Unknown Etiology in Wuhan China: the Mystery and the Miracle | Journal of medical virology | English | China | Hongzhou Lu | Public Health Clinical Center, Fudan Univeristy Shanghai School of Medicine, Shanghai, China | 1 |
| 4 | 1/20/2020 | Genomic characterization of the 2019 novel human-pathogenic coronavirus isolated from a patient with atypical pneumonia after visiting Wuhan | Emerging microbes & infections | English | China | Jasper Fuk-Woo Chan | State Key Laboratory of Emerging Infectious Diseases, The University of Hong Kong, Pokfulam, Hong Kong Special Administrative Region, China | 2 |
| 5 | 1/20/2020 | Genomic and protein structure modelling analysis depicts the origin and infectivity of 2019-nCoV, a new coronavirus which caused a pneumonia outbreak in Wuhan, China | bioRxiv | English | China | Ning Dong | Department of Infectious Diseases and Public Health, Jockey Club College of Veterinary Medicine and Life Sciences, City University of Hong Kong, Kowloon, Hong Kong | 3 |
| 6 | 1/21/2020 | Evolution of the novel coronavirus from the ongoing Wuhan outbreak and modeling of its spike protein for risk of human transmission | SCIENCE CHINA Life Sciences | English | China | Xintian Xu, Ping Chen, Jingfang Wang | Key Laboratory of Molecular Virology and Immunology, Institut Pasteur of Shanghai, Center for Biosafety Mega-Science, Chinese Academy of Sciences | 2 |
| 7 | 1/21/2020 | Host and infectivity prediction of Wuhan 2019 novel coronavirus using deep learning algorithm | bioRxiv | English | China | Qian Guo | State Key Laboratory for Turbulence and Complex Systems, Department of Biomedical Engineering, College of Engineering, and Center for Quantitative Biology, and School of life Sciences, Peking University, Beijing 100871, China | 2 |
| 8 | 1/22/2020 | Estimating the potential total number of novel Coronavirus cases in Wuhan City China | Preprint published bythe Imperial College London | English | United Kingdom | Natsuko Imai | MRC Centre for Global Infectious Disease Analysis, J-IDEA, Imperial College London, UK | 1 |
| 9 | 1/22/2020 | Report 2: Estimating the potential total number of novel Coronavirus cases in Wuhan City, China | Preprint published bythe Imperial College London | English | United Kingdom | Natsuko Imai | MRC Centre for Global Infectious Disease Analysis, J-IDEA, Imperial College London, UK | 1 |
| 10 | 1/22/2020 | Coronaviruses: genome structure, replication, and pathogenesis. | Journal of medical virology | English | China | Yu Chen | State Key Laboratory of Virology, Modern Virology Research Center, College of Life Sciences, Wuhan University | 2 |
| 11 | 1/22/2020 | Emerging coronaviruses: genome structure, replication, and pathogenesis | Journal of medical virology | English | China | Chen Y | State Key Laboratory of Virology, Modern Virology Research Center, College of Life Sciences, Wuhan University, Wuhan, P. R. China. | 2 |
| 12 | 1/22/2020 | Functional assessment of cell entry and receptor usage for lineage B β-coronaviruses, including 2019-nCoV | bioRxiv | English | USA | Michael Letko | Laboratory of Virology, Division of Intramural Research, National Institute of Allergy and Infectious Diseases, National Institutes of Health, Hamilton, MT, 59840, USA | 2 |
| 13 | 1/22/2020 | Homologous recombination within the spike glycoprotein of the newly identified coronavirus may boost cross-species transmission from snake to human | Journal of medical virology | English | China | Wei Ji | Department of Microbiology, Peking University Health Science Center School of Basic Medical Sciences, Beijing, China | 2 |
| 14 | 1/22/2020 | Report 3: Transmissibility of 2019-nCoV | Imperial College and London | English | UK | Natsuko Imai | WHO Collaborating Centre for Infectious Disease Modelling, MRC Centre for Global Infectious Disease Analysis, J-IDEA, Imperial College London, UK | 2 |
| 15 | 1/23/2020 | Modelling the epidemic trend of the 2019 novel coronavirus outbreak in China | bioRxiv | English | China | Mingwang Shen | China-Australia Joint Research Center for Infectious Diseases, School of Public Health, Xi’an Jiaotong University Health Science Center, Xi’an, Shaanxi, 710061, PR China | 1 |
| 16 | 1/23/2020 | Novel coronavirus 2019-nCoV : early estimation of epidemiological parameters and epidemic prediction | medRxiv | English | United Kingdom | Jonathan M. Read | Centre for Health Informatics, Computing and Statistics, Lancaster Medical School, Lancaster University, Lancaster, United Kingdom | 1 |
| 17 | 1/23/2020 | Pattern of early human-to-human transmission of Wuhan 2019-nCoV | bioRxiv | English | Switzerland | Julien Riou | Institute of Social and Preventive Medicine University of Bern Bern, Switzerland | 1 |
| 18 | 1/23/2020 | Detection of 2019 novel coronavirus (2019-nCoV) by real-time RT-PCR | Euro Surveill | English | Germany | Victor M Corman | Charité – Universitätsmedizin Berlin Institute of Virology, Berlin, Germany and German Centre for Infection Research (DZIF),Berlin, Germany | 2 |
| 19 | 1/23/2020 | Discovery of a novel coronavirus associated with the recent pneumonia outbreak in humans and its potential bat origin | bioRxiv | English | China | Peng Zhou | Chinese Academy of Sciences | 2 |
| 20 | 1/24/2020 | The extent of transmission of novel coronavirus in Wuhan, China, 2020 | Journal of clinical medicine | English | Japan | Hiroshi Nishiura | Graduate School of Medicine, Hokkaido University | 1 |
| 21 | 1/24/2020 | A familial cluster of pneumonia associated with the 2019 novel coronavirus indicating person-to-person transmission: a study of a family cluster | Lancet | English | Hongkong, China | Jasper Fuk-Woo Chan | State Key Laboratory of Emerging Infectious Diseases, Carol Yu Centre for Infection, Department of Microbiology, Li Ka Shing Faculty of Medicine, The University of Hong Kong, Pokfulam, Hong Kong Special Administrative Region, China | 2 |
| 22 | 1/24/2020 | A Novel Coronavirus from Patients with Pneumonia in China, 2019 | The New England journal of medicine | English | China | Na Zhu | NHC Key Laboratory of Biosafety, National Institute for Viral Disease Control and Prevention, Chinese Center for Disease Control and Prevention | 2 |
| 23 | 1/24/2020 | Complete genome characterisation of a novel coronavirus associated with severe humanrespiratory disease in Wuhan, China | bioRxiv | English | China | Fan Wu | Shanghai Public Health Clinical Center & School of Public Health, Fudan University, Shanghai, China | 2 |
| 24 | 1/24/2020 | Clinical features of patients infected with 2019 novel coronavirus in Wuhan, China：a descriptive study | Lancet (London, England) | English | China | Chaolin Huang | Jin Yin-tan Hospital, Wuhan, China | 3 |
| 25 | 1/24/2020 | 2019-20 Wuhan coronavirus outbreak:Intense surveillance is vital for preventing sustained transmission in newlocations | bioRxiv | English | United Kingdom | R.N. Thompson | Mathematical Institute, University of Oxford, Oxford, UK | 4 |
| 26 | 1/25/2020 | Origin time and epidemic dynamics of the 2019 novel coronavirus | bioRxiv | English | China | Chi Zhang | Key Laboratory of Vertebrate Evolution and Human Origins, Institute of Vertebrate 8 Paleontology and Paleoanthropology, Chinese Academy of Sciences, Beijing 100044, China | 1 |
| 27 | 1/25/2020 | Preliminary risk analysis of 2019 novel coronavirus spread within and beyond China Watts, Kamran Khan, Zhongjie | bioRxiv | English | UK, Canada, China | Shengjie Lai | WorldPop, School of Geography and Environmental Science, University of Southampton | 1 |
| 28 | 1/25/2020 | Coronavirus Infections and Immune Responses | Journal of Medical Virology | English | China | Geng Li | Guangdong Provincial Key Laboratory of Virology, Institute of Medical Microbiology, Jinan University, Guangzhou 510632, China | 2 |
| 29 | 1/26/2020 | From SARS-CoV to Wuhan 2019-nCoV Outbreak: Similarity of Early Epidemic and Prediction of Future Trends | bioRxiv | English | China,USA | Zeliang Chen | School of Public Health, Sun Yat-sen University | 1 |
| 30 | 1/26/2020 | Transmission dynamics of 2019 novel coronavirus (2019-nCoV) | bioRxiv | English | China | Tao Liu | guangdong province CDC | 1 |
| 31 | 1/26/2020 | Full-genome evolutionary analysis of the novel corona virus (2019-nCoV) rejects the hypothesis of emergence as a result of a recent recombination event | bioRxiv | English | Greece | D. Paraskevis | Department of Hygiene Epidemiology and Medical Statistics, Medical School, National and Kapodistrian University of Athens, Athens, Greece | 2 |
| 32 | 1/26/2020 | Single-cell RNA expression profiling of ACE2, the putative receptor of Wuhan 2019-nCov | bioRxiv | English | China | Yu Zhao | Shanghai East Hospital, School of Medicine, Tongji University | 3 |
| 33 | 1/27/2020 | Breaking down of the healthcare system: Mathematical modelling for controlling the novel coronavirus(2019-nCoV) outbreak in Wuhan, China | bioRxiv | English | China | Wai-Kit Ming | Department of Public Health and Preventive Medicine, School of Medicine, Jinan University, Guangzhou, China | 1 |
| 34 | 1/27/2020 | Early transmissibility assessment of a novel coronavirus in Wuhan, China | SSRN | English | US | Maimuna Majumder | Harvard University | 1 |
| 35 | 1/27/2020 | The incubation period of 2019-nCoV infections among travellers from Wuhan, China | medRxiv | English | The Netherlands | Jantien A. Backer | Centre for Infectious Disease Control, National Institute for Public Health and the Environment, Bilthoven, The Netherlands | 1 |
| 36 | 1/27/2020 | Use of the informational spectrum methodology for rapid biological analysis of the novel coronavirus 2019-nCoV: prediction of potential receptor, natural reservoir, tropism and therapeutic/vaccine target | F1000Research | English | USA, Spain | Veljko Veljkovic | Biomed Protection | 2 |
| 37 | 1/27/2020 | Coronavirus: A Mini-Review | International Journal of Current Research in Medical Science | English | China | Ashikujaman Syed | Department of Pharmacy, School of Pharmacy, China Pharmaceutical University; Nanjing, Jiangsu, China. | 3 |
| 38 | 1/27/2020 | Estimation of the Transmission Risk of 2019-nCov and Its Implication for Public Health Interventions | Available at SSRN 3525558 | English | China | Biao Tang | Xi'an Jiaotong University | 4 |
| 39 | 1/27/2020 | Nelfinavir was predicted to be a potential inhibitor of 2019-nCov main protease by an integrative approach combining homology modelling, molecular docking and binding freeenergy calculation | bioRxiv | English | China | Zhijian Xu | CAS Key Laboratory of Receptor Research; Drug Discovery and Design Center, Shanghai Institute of Materia Medica, Chinese Academy of Sciences, Shanghai, 201203, China | 4 |
| 40 | 1/28/2020 | Epidemiological characteristics of novel coronavirus infection: A statistical analysis of publicly available case data | medRxiv | English | Japan | Natalie M. Linton | Graduate School of Medicine, Hokkaido University | 1 |
| 41 | 1/28/2020 | Epidemiological identification of a novel infectious disease in real time: Analysis of the atypical pneumonia outbreak in Wuhan, China, 2019-20 | medRxiv | English | Japan, UK | Sung-mok Jung | Graduate School of Medicine, Hokkaido University | 1 |
| 42 | 1/28/2020 | Importation and Human-to-Human Transmission of a Novel Coronavirus in Vietnam | The New England journal of medicine | English | Vietnam | Lan T. Phan | Pasteur Institute Ho Chi Minh City, Ho Chi Minh City, Vietnam | 2 |
| 43 | 1/28/2020 | Potent binding of 2019 novel coronavirus spike protein by a SARS coronavirus-specific human monoclon alantibody | bioRxiv | English | China | Xiaolong Tian | Fudan university | 3 |
| 44 | 1/28/2020 | Beware of asymptomatic transmission: Study on 2019-nCoV prevention and control measures based on extended SEIR model | bioRxiv | English | China | Peng Shao | School of Management, Xi’an Polytechnic University, Xi’an 710048, China | 4 |
| 45 | 1/28/2020 | Drug treatment options for the 2019-new coronavirus (2019-nCoV) | Bioscience trends | English | China | Hongzhou Lu | Scientific Research Center, Shanghai Public Health Clinical Center, Fudan University, Shanghai, China; | 4 |
| 46 | 1/28/2020 | Sofosbuvir Can Inhibit the Newly Emerged Coronavirus (2019-nCoV) in Wuhan, China | Lancet | English | Egypt | Abdo A Elfiky | Cairo University - Biophysics Department; Al Jouf University - College of Applied Medical Sciences | 4 |
| 47 | 1/28/2020 | Therapeutic Drugs Targeting 2019-nCoV Main Protease by High-Throughput Screening | bioRxiv | English | China | Yan Li | sichuan university | 4 |
| 48 | 1/29/2020 | Epidemiological and clinical characteristics of 99 cases of 2019 novel coronavirus pneumonia in Wuhan, China: a descriptive study | The Lancet | English | China | NanshanChen | Tuberculosis and Respiratory Department, Wuhan Jinyintan Hospital, Wuhan, China | 1 |
| 49 | 1/29/2020 | Updated understanding of the outbreak of 2019 novel coronavirus (2019-nCoV) in Wuhan, China | Journal of medical virology | English | China | Weier Wang. | Department of Hepatobiliary and Pancreatic Surgery, Zhejiang Provincial People’s Hospital, Hangzhou Medical College, Hangzhou, 310014, Zhejiang Province, China | 1 |
| 50 | 1/29/2020 | Early Transmission Dynamics in Wuhan, China, of Novel Coronavirus-Infected Pneumonia | The New England journal of medicine | English | China | Qun Li, | Chinese Center for Disease Control and Prevention, Beijing | 2 |
| 51 | 1/29/2020 | Pneumonia of Unknown Etiology in Wuhan, China: Potential for International Spread Via Commercial Air Travel | Journal of Travel Medicine | English | Canada & UK | Isaac I. Bogoch | Department of Medicine, University of Toronto, Toronto, Canada | 2 |
| 52 | 1/29/2020 | Receptor recognition by novel coronavirus from Wuhan: An analysis based on decade-long structural studies of SARS | Journal of virology | English | USA | Yushun Wan | Department of Veterinary and Biomedical Sciences, College of Veterinary Medicine, University of Minnesota, Saint Paul, MN, USA | 2 |
| 53 | 1/29/2020 | The 2019-new coronavirus epidemic: evidence for virus evolution | Journal of medical virology | English | Italy&Brazil | Domenico Benvenuto | Unit of Medical Statistics and Molecular Epidemiology, University Campus Bio-Medico of Rome, Italy. | 2 |
| 54 | 1/29/2020 | Clinical characteristics and syndrome differentiation of new coronavirus (2019-nCoV) pneumonia in traditional Chinese medicine | Journal of Traditional Chinese Medicine | Chinese | China | Yuguang Wang | Beijing Hospital of traditional Chinese Medicine Affiliated to Capital Medical University | 3 |
| 55 | 1/29/2020 | Disinfection measures for pneumonia foci infected by novel coronavirus in 2019 | Chinese journal of Disinfection | Chinese | China | Qiuhua Wei | Center for Disease Control and prevention of the people's Liberation Army of China | 4 |
| 56 | 1/29/2020 | Potential inhibitors for 2019-nCoV coronavirus M protease from clinically approved medicines | bioRxiv | English | China | Xin Liu | Chinese Academy of Sciences | 4 |
| 57 | 1/30/2020 | Preliminary estimation of the basic reproduction number of novel coronavirus (2019-nCoV) in China, from 2019 to 2020: A data-driven analysis in the early phase of the outbreak | bioRxiv | English | China, USA, Hongkong | Shi Zhao | chinese university of hongkong | 1 |
| 58 | 1/30/2020 | Evolution and variation of 2019-novel coronavirus | bioRxiv | English | China | Chenglong Xiong | Department of Public Health Microbiology, School of Public Health, Fudan University, Shanghai 200032, China | 2 |
| 59 | 1/30/2020 | Identification of a novel coronavirus causing severe pneumonia in human: a descriptive study | Chinese Medical Journal | Chinese | China | Li-Li Ren | National Health Commission of the People’s Republic of China Key Laboratory of Systems Biology of Pathogens and Christophe Mérieux Laboratory, Institute of Pathogen Biology, Chinese Academy of Medical Sciences & Peking Union Medical College | 2 |
| 60 | 1/30/2020 | Potential of large 'first generation' human-to-human transmission of 2019-nCoV | Journal of medical virology | English | China | Xingguang LI | Hubei Engineering Research Center of Viral Vector, Wuhan University of Bioengineering, Wuhan 430415, China. | 2 |
| 61 | 1/30/2020 | Beijing Union Medical College Hospital on "pneumonia of novel coronavirus infection" diagnosis and treatment proposal (V2.0) | Medical Journal of Peking Union Medical College Hospital | Chinese | China | Taisheng Li | Department of infectious medicine, Peking union medical college hospital, Chinese academy of medical sciences中国医学科学院北京协和医学院北京协和医院感染内科 | 3 |
| 62 | 1/30/2020 | Uncanny similarity of unique inserts in the 2019-nCoV spike protein to HIV-1 gp120 and Gag | bioRxiv | English | India | Prashant Pradhan, | Kusuma School of biological sciences, Indian institute of technology | 3 |
| 63 | 1/30/2020 | Suggestions on management strategies of pregnant women infected with new coronavirus (2019 ncov) in Henan Province | Journal of Zhengzhou University(Medical Sciences) | Chinese | China | Xinyan Wang | Department of Obstetrics and Gynecology, the First Affiliated Hospital of Zhengzhou University | 4 |
| 64 | 1/30/2020 | Investigation on the psychological status of the first batch of clinical first-line support nurses to fight against pneumonia caused by novel coronavirus. | Chinese Nursing  Reserch. | Chinese | China | Mingchuan Xu | Tongji hospital affiliated to Tongji medical college of Huazhong university of science and technology. | 4 |
| 65 | 1/31/2020 | Nowcasting and forecasting the potential domestic and international spread of the 2019-nCoV outbreak originating in Wuhan, China: a modelling study | The Lancet | English | China | Joseph T Wu, Kathy Leung | WHO Collaborating Centre for Infectious Disease Epidemiology and Control, School of Public Health,Li Ka Shing Faculty of Medicine,University of Hong Kong,Hong Kong, China | 2 |
| 66 | 1/31/2020 | The digestive system is a potential route of 2019-nCov infection: a bioinformatics analysis based on single-cell transcriptomes | bioRxiv | English | China | Hao Zhang | changzheng hospital | 3 |
| 67 | 1/31/2020 | Application effect of hazard vulnerability analysis in cope with 2019 novel coronavirus transmission in non⁃closed hematology ward | Nursing Research of China | Chinese | China | Chen Bin | Mianyang Central Hospital | 4 |
| 68 | 1/31/2020 | Countermeasures for rapid spread of new coronavirus pneumonia in Wuhan | Chinese General Practicing Nursing | Chinese | China | Fen Ouyang | Tongji hospital affiliated to Tongji medical college of Huazhong university of science and technology. | 4 |
| 69 | 1/31/2020 | Prevalence, nosocomial infection and psychological prevention of novel coronavirus infection | Chinese General Practice Nursing | Chinese | China | Chen Wang | School of medical technology and nursing, wuhan polytechnic university武汉轻工大学医学技术与护理学院 | 4 |
| 70 | 2020/1/19 | A mathematical model for simulating the transmission of Wuhan novel Coronavirus | bioRxiv | English | China | Tianmu Chen | State Key Laboratory of Molecular Vaccinology and Molecular Diagnostics, School of Public Health, Xiamen University, Xiamen City 361102, Fujian Province, People’s Republic of China | 1 |

*Category 1= Epidemiology, 2= Causes, 3 = Clinical manifestation and diagnosis, 4= Prevention and Treatment
